# Supplementary material for: Comparison of Various Solvent Extracts and Major Bioactive Components from Portulaca oleracea for Antioxidant, Anti-Tyrosinase, and Anti-α-Glucosidase Activities
Source: MDPI journal article supplement (doi:10.3390/antiox11020398), 2022-02-16
Supplement: s1 [file s1]

## Supplementary data

# Comparison of Various Solvent Extracts and Major Bioactive Components from *Portulaca oleracea* for Antioxidant, Anti-tyrosinase, and Anti- $\alpha$ -glucosidase Activities

Wei-Cheng Chen <sup>1,2,†</sup>, Shih-Wei Wang <sup>1,3,4,†</sup>, Cai-Wei Li <sup>5</sup>, Hsiang-Ru Lin <sup>6</sup>, Chang-Syun Yang <sup>7</sup>, Yi-Cheng Chu <sup>5</sup>, Tzong-Huei Lee <sup>8,\*</sup>, Jih-Jung Chen <sup>7,9,\*</sup>

<sup>1</sup> Department of Medicine, MacKay Medical College, New Taipei City 252, Taiwan; wchena7648@gmail.com (W.-C. C.); shihwei@mmc.edu.tw (S.-W.W.)

<sup>2</sup> Division of Sports Medicine & Surgery, Department of Orthopedic Surgery, MacKay Memorial Hospital, Taipei 104, Taiwan

<sup>3</sup> Institute of Biomedical Sciences, MacKay Medical College, New Taipei City 252, Taiwan

<sup>4</sup> Graduate Institute of Natural Products, Kaohsiung Medical University, Kaohsiung 807, Taiwan

<sup>5</sup> Institute of Traditional Medicine, National Yang Ming Chiao Tung University, Taipei 112, Taiwan; leecw1219.y@nycu.edu.tw (C.-W.L.); chuyc.md07@nycu.edu.tw (Y.-C.C.)

<sup>6</sup> Department of Chemistry, College of Science, National Kaohsiung Normal University, Kaohsiung 824, Taiwan; t3136@nknu.edu.tw

<sup>7</sup> Department of Pharmacy, School of Pharmaceutical Sciences, National Yang Ming Chiao Tung University, Taipei 112, Taiwan; tim0619@nycu.edu.tw (C.-S.Y.)

<sup>8</sup> Institute of Fisheries Science, National Taiwan University, Taipei 106, Taiwan

<sup>9</sup> Department of Medical Research, China Medical University Hospital, China Medical University, Taichung 404, Taiwan

\* Correspondence: jjungchen@nycu.edu.tw; Tel.: +886-2-2826-7195; Fax: +886-2-2823-2940

† Authors have contributed equally in this manuscript.

## Contents

Table S1. Retention time, LODs, LOQs, and regression analysis for seven components in

|                                                                             |    |
|-----------------------------------------------------------------------------|----|
| <i>Portulaca oleracea</i> in reverse phase HPLC.....                        | S3 |
| Figure S1. Reverse-phase HPLC chromatogram of isolated compounds.....       | S3 |
| Figure S2. Reverse-phase HPLC chromatogram of methanol extract.....         | S4 |
| Figure S3. Reverse-phase HPLC chromatogram of ethanol extract.....          | S4 |
| Figure S4. Reverse-phase HPLC chromatogram of acetone extract.....          | S4 |
| Figure S5. Reverse-phase HPLC chromatogram of ethyl acetate extract.....    | S5 |
| Figure S6. Reverse-phase HPLC chromatogram of dichloromethane extract.....  | S5 |
| Figure S7. Reverse-phase HPLC chromatogram of chloroform extract.....       | S5 |
| Figure S8. Reverse-phase HPLC chromatogram of <i>n</i> -hexane extract..... | S6 |

Table S1. Retention time, LODs, LOQs, and regression analysis for seven components in *Portulaca oleracea* in reverse-phase HPLC.

| Compounds                  | T <sub>m</sub> (min) <sup>a</sup> | Regression equation    | Correlation coefficient | LOD (μg/mL) <sup>a</sup> | LOQ (μg/mL) <sup>a</sup> |
|----------------------------|-----------------------------------|------------------------|-------------------------|--------------------------|--------------------------|
| Rosmarinic acid            | 21.9                              | $y = 48958x + 3675.1$  | 0.9996                  | 0.19                     | 0.53                     |
| Chlorogenic acid           | 23.8                              | $y = 45096x - 3594.4$  | 0.9999                  | 0.15                     | 0.50                     |
| <i>p</i> -Coumaric acid    | 26.2                              | $y = 83338x + 1645.5$  | 0.9993                  | 0.20                     | 0.63                     |
| Caffeic acid               | 28.0                              | $y = 75513x - 724.3$   | 0.9997                  | 0.15                     | 0.52                     |
| <i>trans</i> -Ferulic acid | 42.1                              | $y = 130798x - 7125.5$ | 0.9999                  | 0.10                     | 0.48                     |
| Quercetin                  | 52.3                              | $y = 27262x + 957.4$   | 0.9998                  | 0.14                     | 0.65                     |
| Kaempferol                 | 63.1                              | $y = 29758x + 1079.9$  | 0.9997                  | 0.20                     | 0.65                     |

<sup>a</sup> T<sub>m</sub>: Retention time; LOD: Limit of detection; LOQ: Limit of quantification

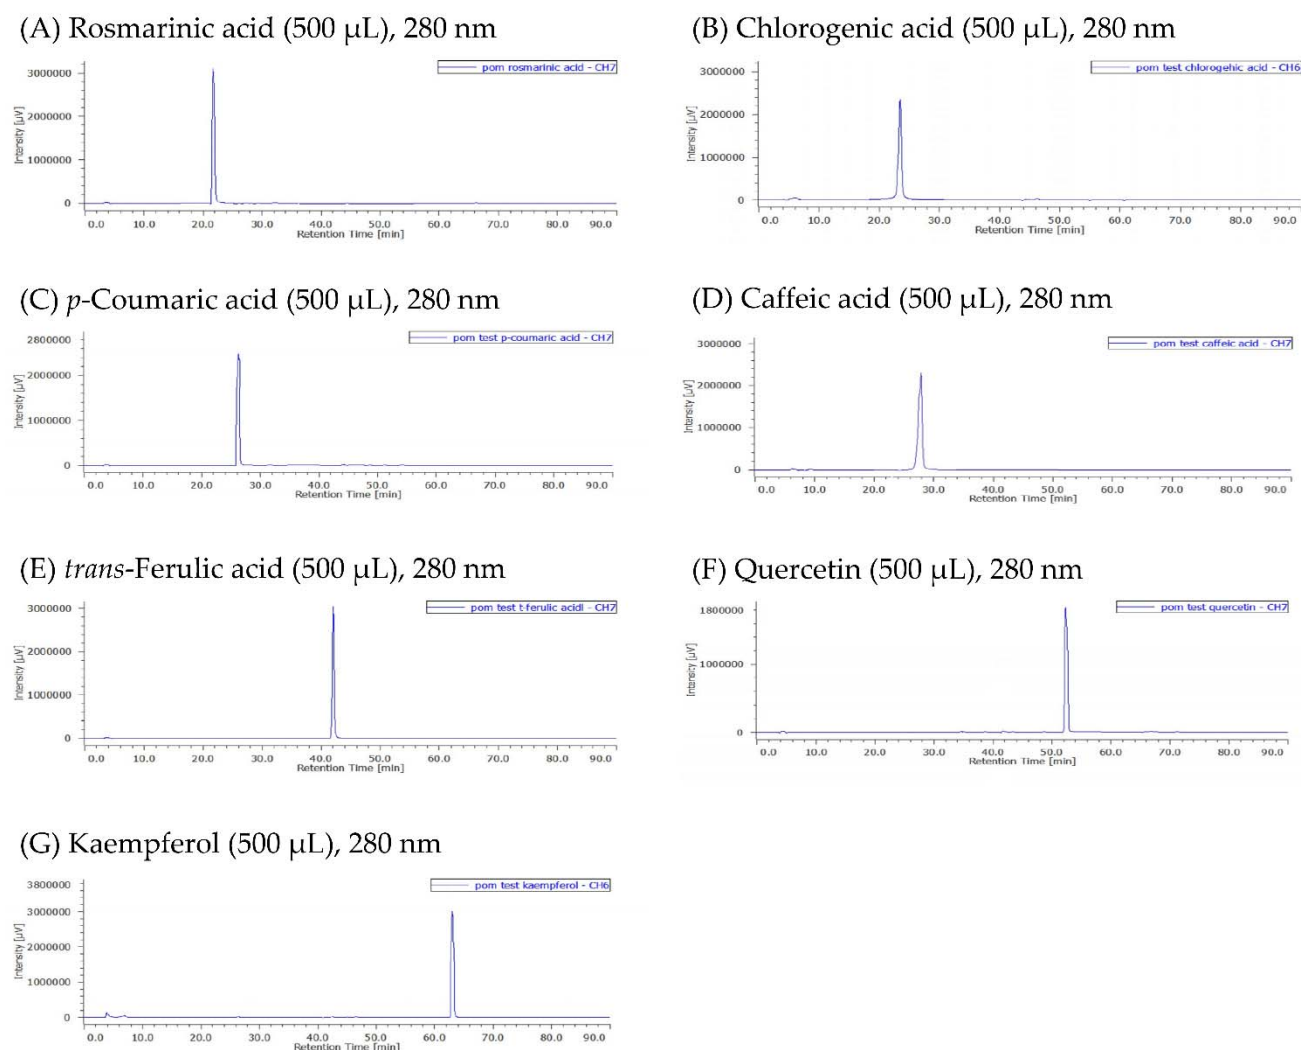

Figure S1. Reverse-phase HPLC chromatogram of isolated compounds (A to G).

Methanol (500  $\mu$ L), 280 nm

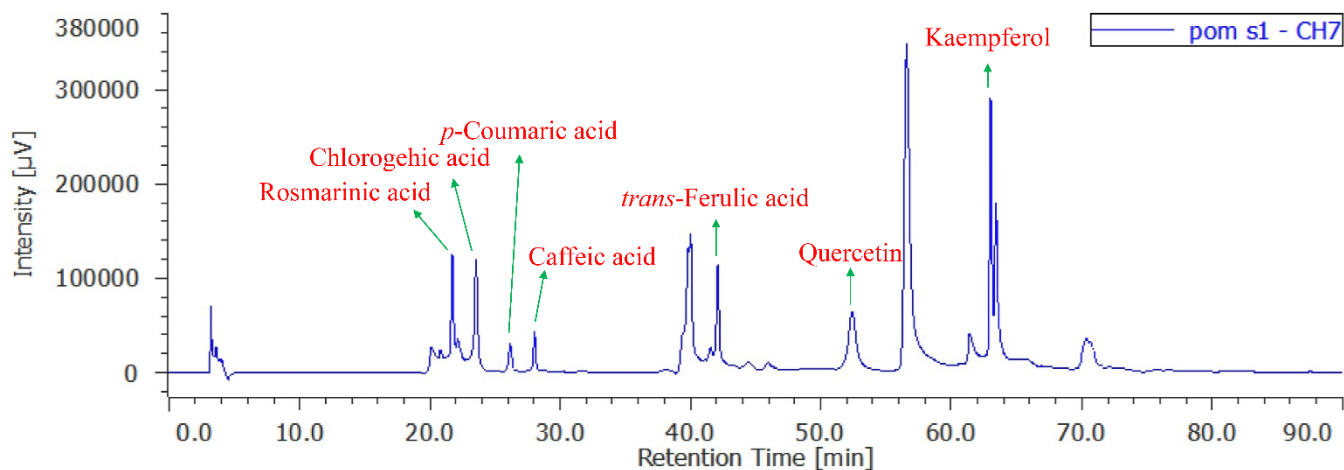

Figure S2. Reverse-phase HPLC chromatogram of methanol extract.

Ethanol (500  $\mu$ L), 280 nm

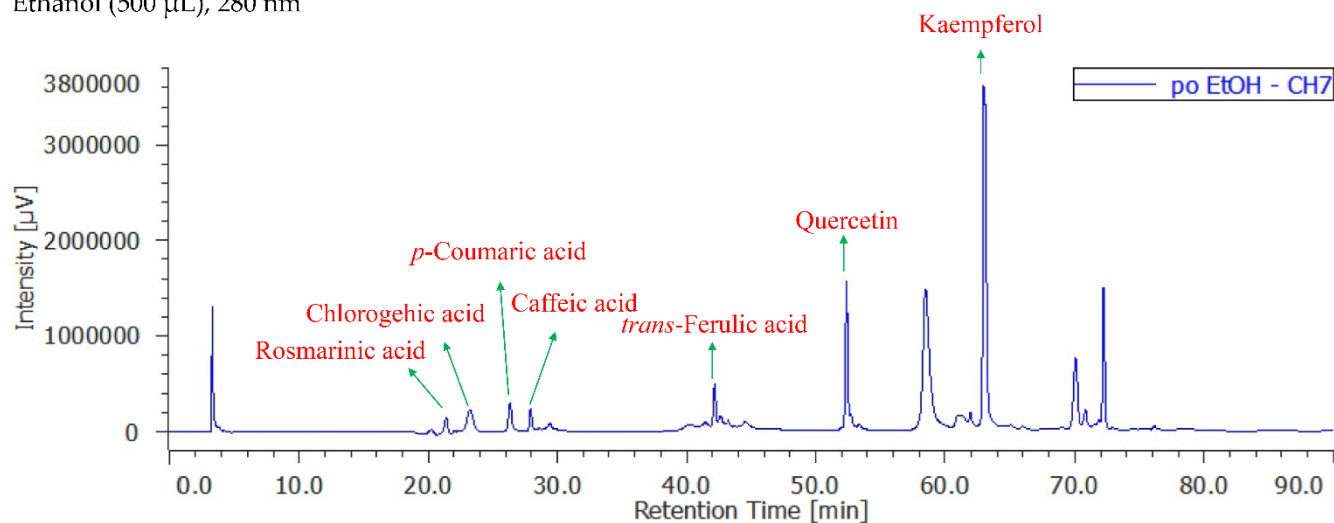

Figure S3. Reverse-phase HPLC chromatogram of ethanol extract.

Acetone (500  $\mu$ L), 280 nm

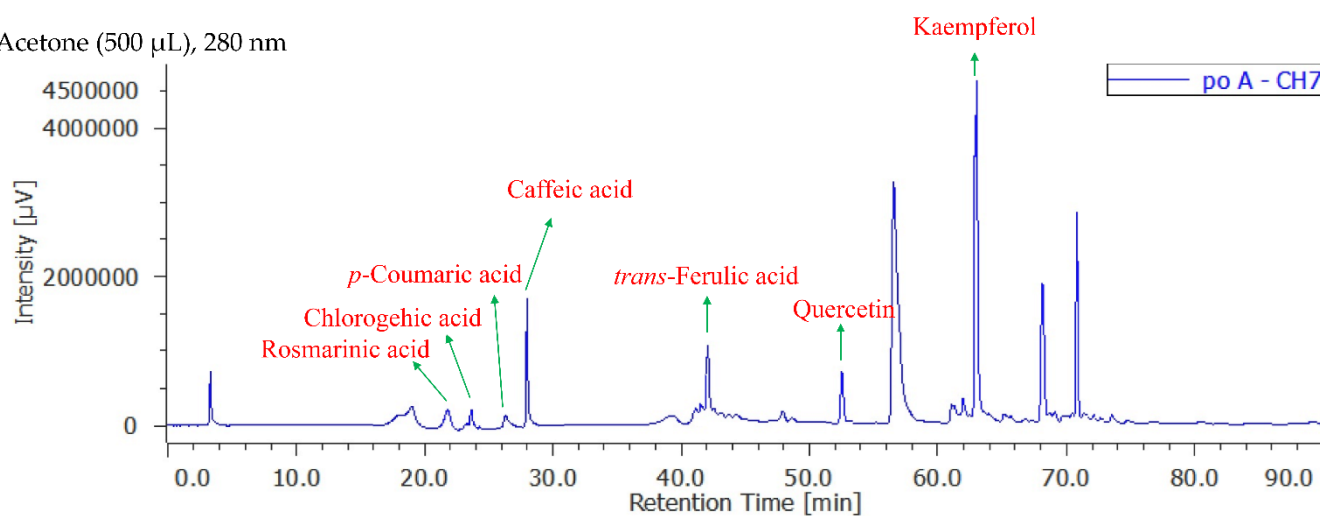

Figure S4. Reverse-phase HPLC chromatogram of acetone extract.

Ethyl acetate (500  $\mu$ L), 280 nm

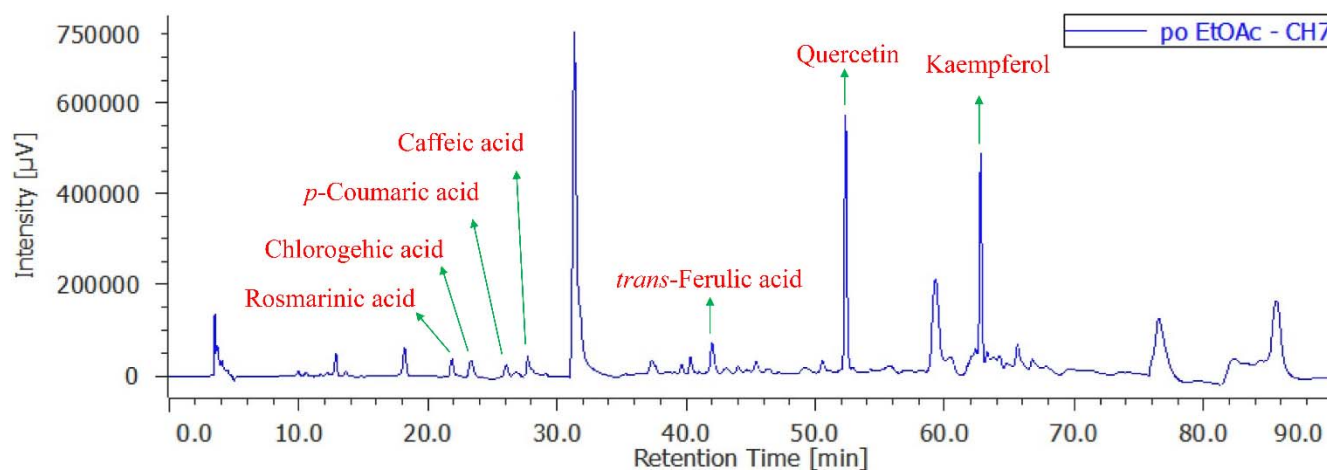

Figure S5. Reverse-phase HPLC chromatogram of ethyl acetate extract.

Chloroform (500  $\mu$ L), 280 nm

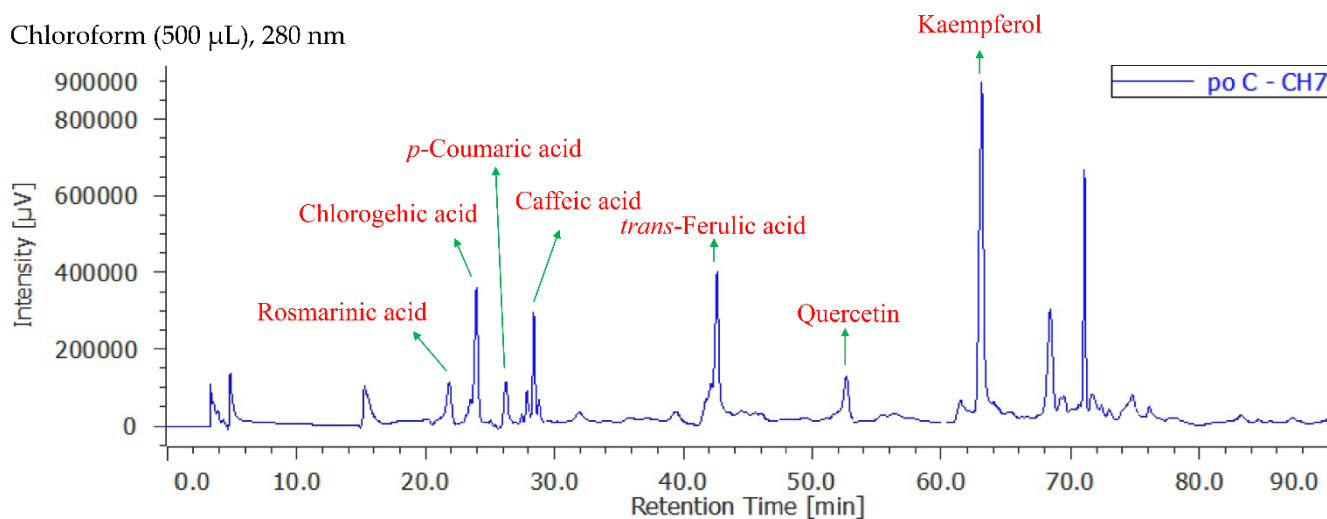

Figure S6. Reverse-phase HPLC chromatogram of dichloromethane extract.

Dichloromethane (500  $\mu$ L), 280 nm

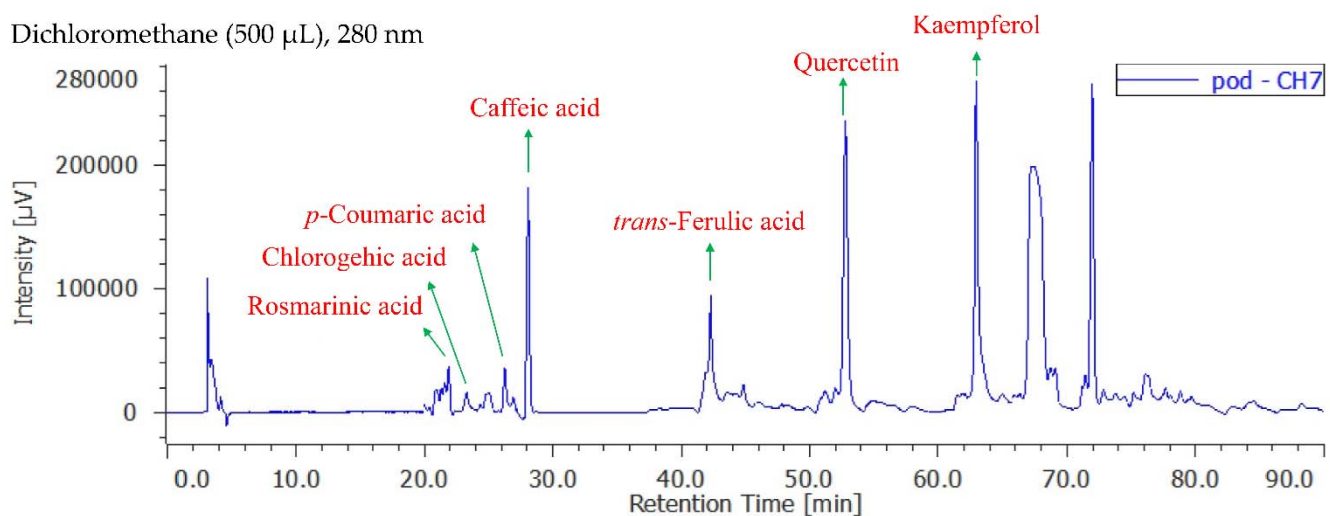

Figure S7. Reverse-phase HPLC chromatogram of chloroform extract.

*n*-Hexane (500  $\mu$ L), 280 nm

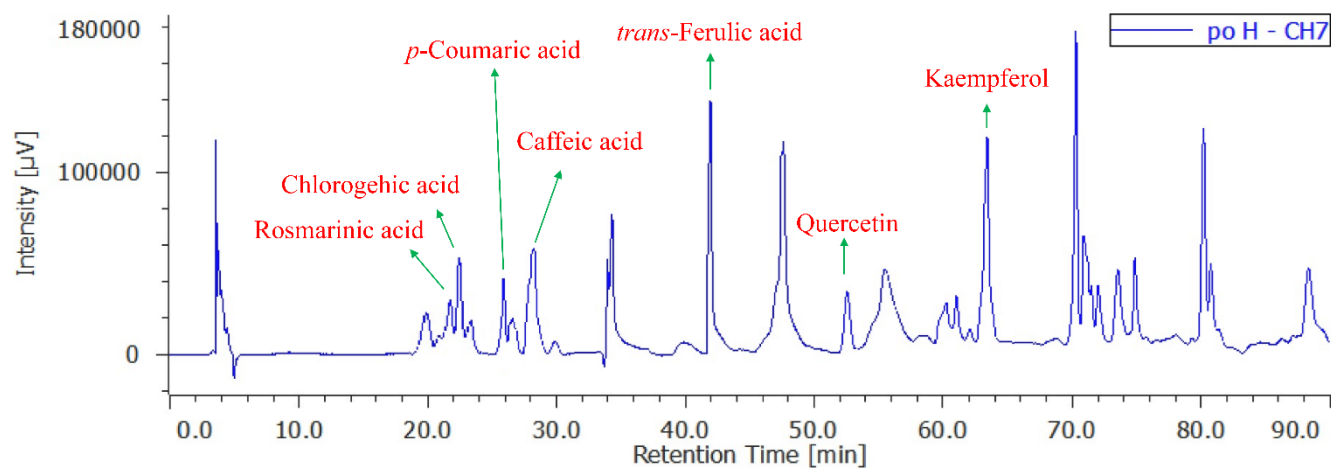

Figure S8. Reverse-phase HPLC chromatogram of *n*-hexane extract.
